# Supplementary material for: A phase Ib study of everolimus combined with metformin for patients with advanced cancer
Source: Springer Nature journal article supplement (doi:10.1007/s10637-017-0478-4), 2017-06-15
Supplement: MOESM1 [file 12445352]

## SUPPLEMENTARY FIGURES

### Supplementary Figure 1:

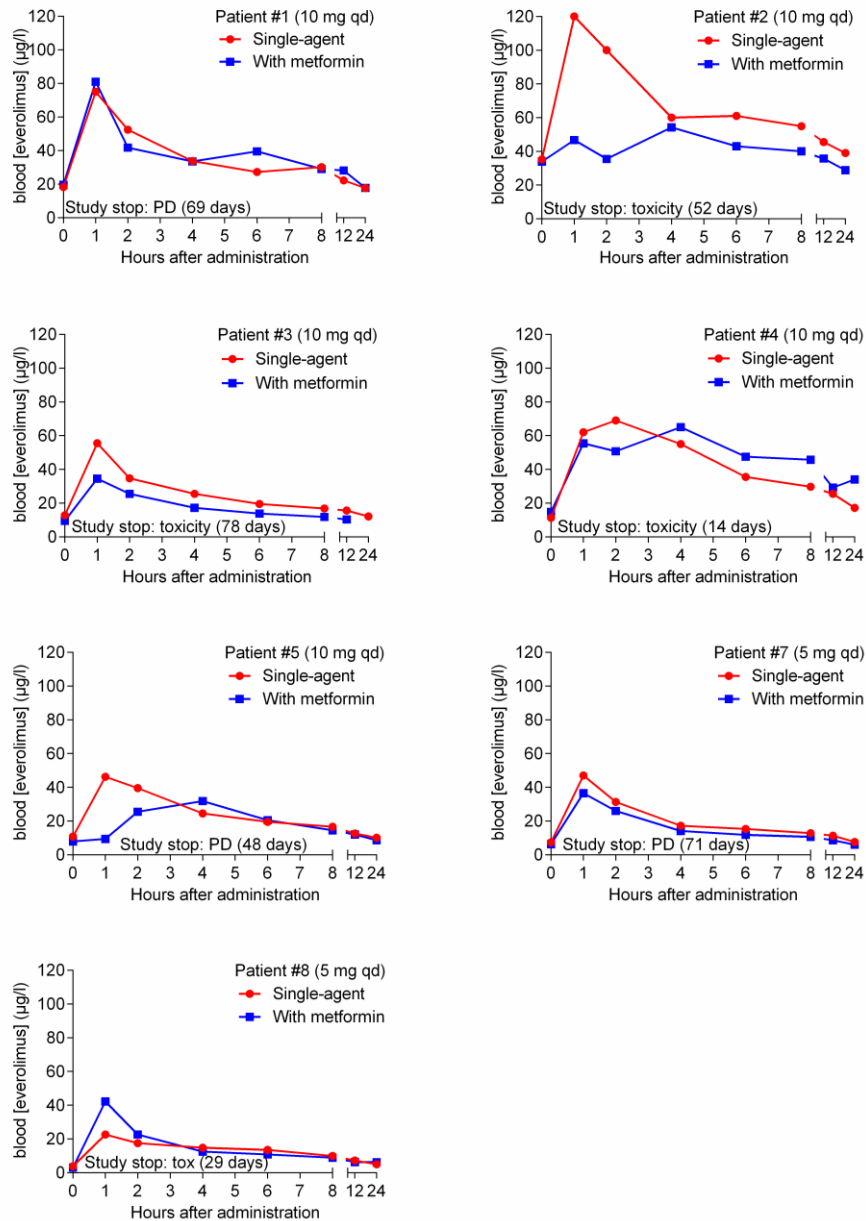

**Everolimus concentration-time curves for individual patients.** Blood everolimus concentration-time curves in µg/l of 5 patients who received 10 mg everolimus qd (#1-5) and 3 patients who received 5 mg everolimus qd (#6-8). Everolimus levels were determined in whole blood by high-performance liquid chromatography with tandem mass spectrometry (HPLC-MS/MS). The duration on study treatment and reason for study termination is shown for each patient. Abbreviations: PD, progressive disease; tox, toxicity.

## Supplementary Figure 2:

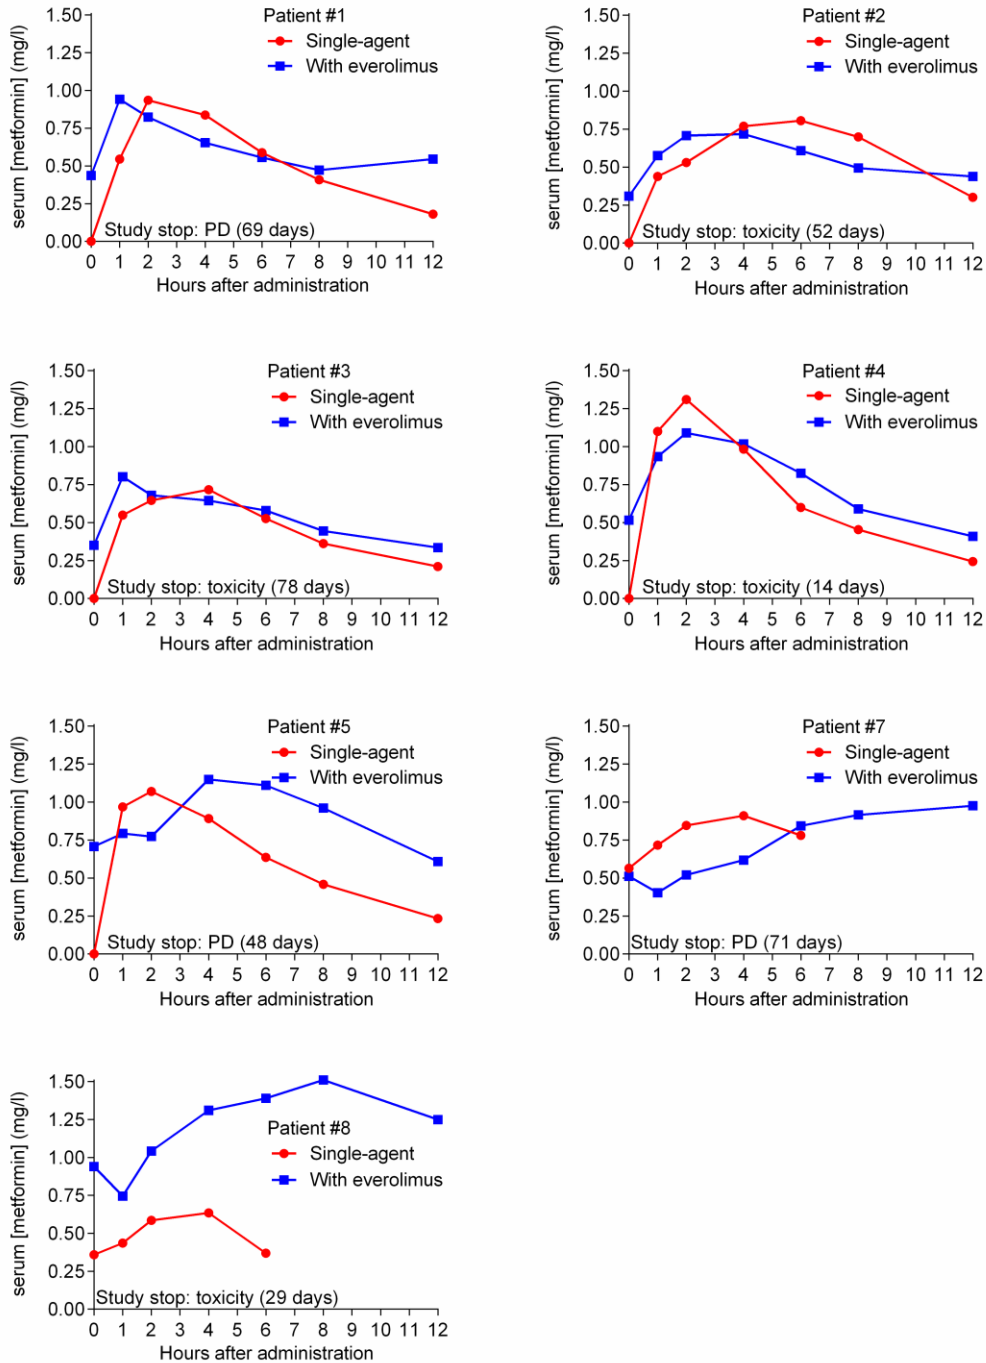

**Metformin concentration-time curves for individual patients.** Serum metformin concentration-time curves in mg/l of 9 patients who received 500 mg metformin bid. Metformin levels were determined in serum by high-performance liquid chromatography with tandem mass spectrometry (HPLC-MS/MS). The duration on study and reason for study termination is shown for each patient. Abbreviation: PD, progressive disease.

## SUPPLEMENTARY TABLES

Supplementary Table 1:

| Lab test                          | Screening (n) | Day 1 (n) | Day 22 (n) | Day 43 (n) | Day 64 (n) |
|-----------------------------------|---------------|-----------|------------|------------|------------|
| Hemoglobin (mmol/l)               | 7.6 (9)       | 7.2 (6)   | 7.2 (7)    | 7.3 (6)    | 6.8 (3)    |
| Leukocytes (*10 <sup>9</sup> /l)  | 7.8 (9)       | 8.4 (5)   | 6.7 (7)    | 7.2 (6)    | 6.1 (3)    |
| Neutrophils (*10 <sup>9</sup> /l) | 5.2 (9)       | 6.6 (5)   | 4.5 (6)    | 5.2 (6)    | 4.3 (3)    |
| Platelets (*10 <sup>9</sup> /l)   | 243.2 (9)     | 207 (5)   | 160.4 (7)  | 196.7 (6)  | 198 (3)    |
| Sodium (mmol/l)                   | 138.3 (9)     | 138.5 (4) | 138 (3)    | 134.8 (6)  | 135.7 (3)  |
| Potassium (mmol/l)                | 3.8 (9)       | 3.9 (5)   | 3.6 (3)    | 3.9 (6)    | 3.8 (3)    |
| Creatinin (μmol/l)                | 78.8 (9)      | 68 (5)    | 87 (3)     | 78.7 (6)   | 75 (3)     |
| Ureum (mmol/l)                    | 4.4 (9)       | 4.6 (4)   | 5.2 (3)    | 4.7 (6)    | 4.1 (3)    |
| Albumin (g/l)                     | 41.7 (9)      | 39 (5)    | 41 (2)     | 39.2 (5)   | 38.3 (3)   |
| CRP (mg/l)                        | 30.7 (8)      | 24.5 (4)  | 6.2 (1)    | 47.0 (5)   | 78.3 (3)   |
| Glucose (mmol/l)                  | 5.5 (9)       | 6.5 (6)   | 7.6 (2)    | 9.5 (5)    | 14.2 (3)   |
| Insulin (pmol/l)                  | 112.1 (8)     | 101.5 (2) | 164.5 (2)  | 137.5 (4)  | 230.7 (3)  |
| IGF-bind. prot.-3 (mg/l)          | 1.6 (8)       | 2.0 (2)   | 1.6 (2)    | 1.6 (4)    | 1.5 (3)    |
| IGF-1 (nmol/l)                    | 18.6 (8)      | 34 (1)    | 15 (2)     | 18.3 (4)   | 17.3 (3)   |

Hematology and clinical chemistry parameters for included patients during study treatment.

Supplementary Table 2:

| Parameter        | Unit            | Everolimus (5 mg, n = 2) |                |
|------------------|-----------------|--------------------------|----------------|
|                  |                 | Single-agent             | In combination |
| C <sub>max</sub> | μg/l            | 34.80                    | 39.45          |
| λ <sub>z</sub>   | h <sup>-1</sup> | 0.044                    | 0.035          |
| AUC              | μg/l*h          | 281.78                   | 253.61         |

Pharmacokinetic parameters of 5 mg everolimus qd (n = 2 patients). T<sub>1/2</sub>, CL and V<sub>z</sub> are pharmacokinetic parameters that are independent of dose and were calculated for all 7 patients with everolimus concentration-time curves and are shown in **Table 5** of the main manuscript.
